# Supplementary material
Source: PubMed Central journal article supplement (PMC10772975)
Supplement: NIHMS1956150-supplement-1.pdf [file NIHMS1956150-supplement-1.pdf]

**Supplemental Table 1.** Biomarkers from cord blood and peripheral blood at survey 33 months, by groups.

| <b>Cord-blood (n=309)</b>          | <b>Positive API (n=44)</b> | <b>Negative API (n=265)</b> | <b>*p value</b> |
|------------------------------------|----------------------------|-----------------------------|-----------------|
| Club cell16 (ng/mL)                | 4.40 ± 2.9                 | 3.81 ± 2.94                 | 0.18            |
| Adiponectin (ug/mL)                | 11.48 ± 3.82               | 10.1 ± 3.89                 | <b>0.029</b>    |
| Leptin (ng/mL)                     | 8.94± 1.39                 | 8.63 ± 1.20                 | 0.20            |
| TNF- alfa (pg/mL)                  | 8.36 ± 3.46                | 8.13 ± 3.63                 | 0.56            |
| IL-b1 (pg/mL)                      | 1.23 ± 0.72                | 1.17 ± 0.77                 | 0.66            |
| IL-4 (pg/mL)                       | 2.44 ± 0.68                | 2.34 ± 0.73                 | 0.47            |
| IL-6 (pg/mL)                       | 2.19 ± 0.88                | 2.07 ± 0.93                 | 0.72            |
| IL-10 (pg/mL)                      | 1.17 ± 0.87                | 1.03 ± 0.67                 | 0.38            |
| IL-12 p40 (pg/mL)                  | 3.48 ± 0.41                | 3.35 ± 0.56                 | <b>0.095</b>    |
| IL-12 p70 (pg/mL)                  | 2.16 ± 0.97                | 2.14 ± 0.93                 | 1.0             |
| IL-13 (pg/mL)                      | 2.48 ± 0.64                | 2.40 ± 0.89                 | 1.0             |
| usPCR                              | UD                         | UD                          |                 |
| 25(OH)D total                      | 23.83 ± 10.49              | 21.55 ± 8.48                | <b>0.087</b>    |
| <b>At 33 months of age (n=164)</b> | <b>Positive API (n=26)</b> | <b>Negative API (n=138)</b> | <b>*p value</b> |
| % Phadiatop > 0.35 kU/L **         | 15%                        | 26%                         | 0.40            |
| Club cell16 (ng/mL)                | 6.92 ± 3.56                | 6.91 ± 3.17                 | 0.91            |
| Adiponectin (ug/mL)                | 8.15 ± 1.80                | 8.23 ± 2.6                  | 0.88            |
| Leptin (ng/mL)                     | 6.94 ± 0.91                | 6.70 ± 0.96                 | 0.44            |
| IL-33 (pg/mL)                      | 3.43 ± 1.64                | 3.22 ± 1.35                 | 0.71            |
| TSLP (pg/mL)                       | 3.33 ± 2.67                | 2.92 ± 1.32                 | 0.93            |
| IL-beta1 (pg/mL)                   | 0.47 ± 0.15                | 0.53 ± 0.27                 | 0.14            |
| IL-4 (pg/mL)                       | 1.65 ± 0.57                | 1.87 ± 0.81                 | 0.20            |
| IL-6 (pg/mL)                       | 2.04 ± 1.5                 | 2.09 ± 1.02                 | 0.72            |
| IL-10 (pg/mL)                      | 3.62 ± 0.79                | 3.31 ± 0.64                 | <b>0.034</b>    |
| IL-12 p40 (pg/mL)                  | 2.96 ± 0.55                | 2.86 ± 0.68                 | 0.49            |
| IL-13 (pg/mL)                      | 1.60 ± 1.36                | 1.36 ± 1.07                 | 0.59            |
| us-PCR                             | 0.80 ± 0.78                | 0.64 ± 0.69                 | 0.46            |

Numbers were express as % or mean ± SD (after natural log transformation), UD: undetectable.

\*p value for trend by ANOVA test.

\*\* Data for Phadiatop was available for 20 and 96 subjects in the positive and negative API, respectively.
